# Supplementary material
Source: publisher figshare collection journal article supplement (https://springernature.figshare.com/ndownloader/files/17085362)

# Type 1 Diabetes

Do not exercise if had a hypo. within the previous 24 h that required assistance from another individual to treat the event.

Glucose Level ?

Do not exercise if feeling unwell

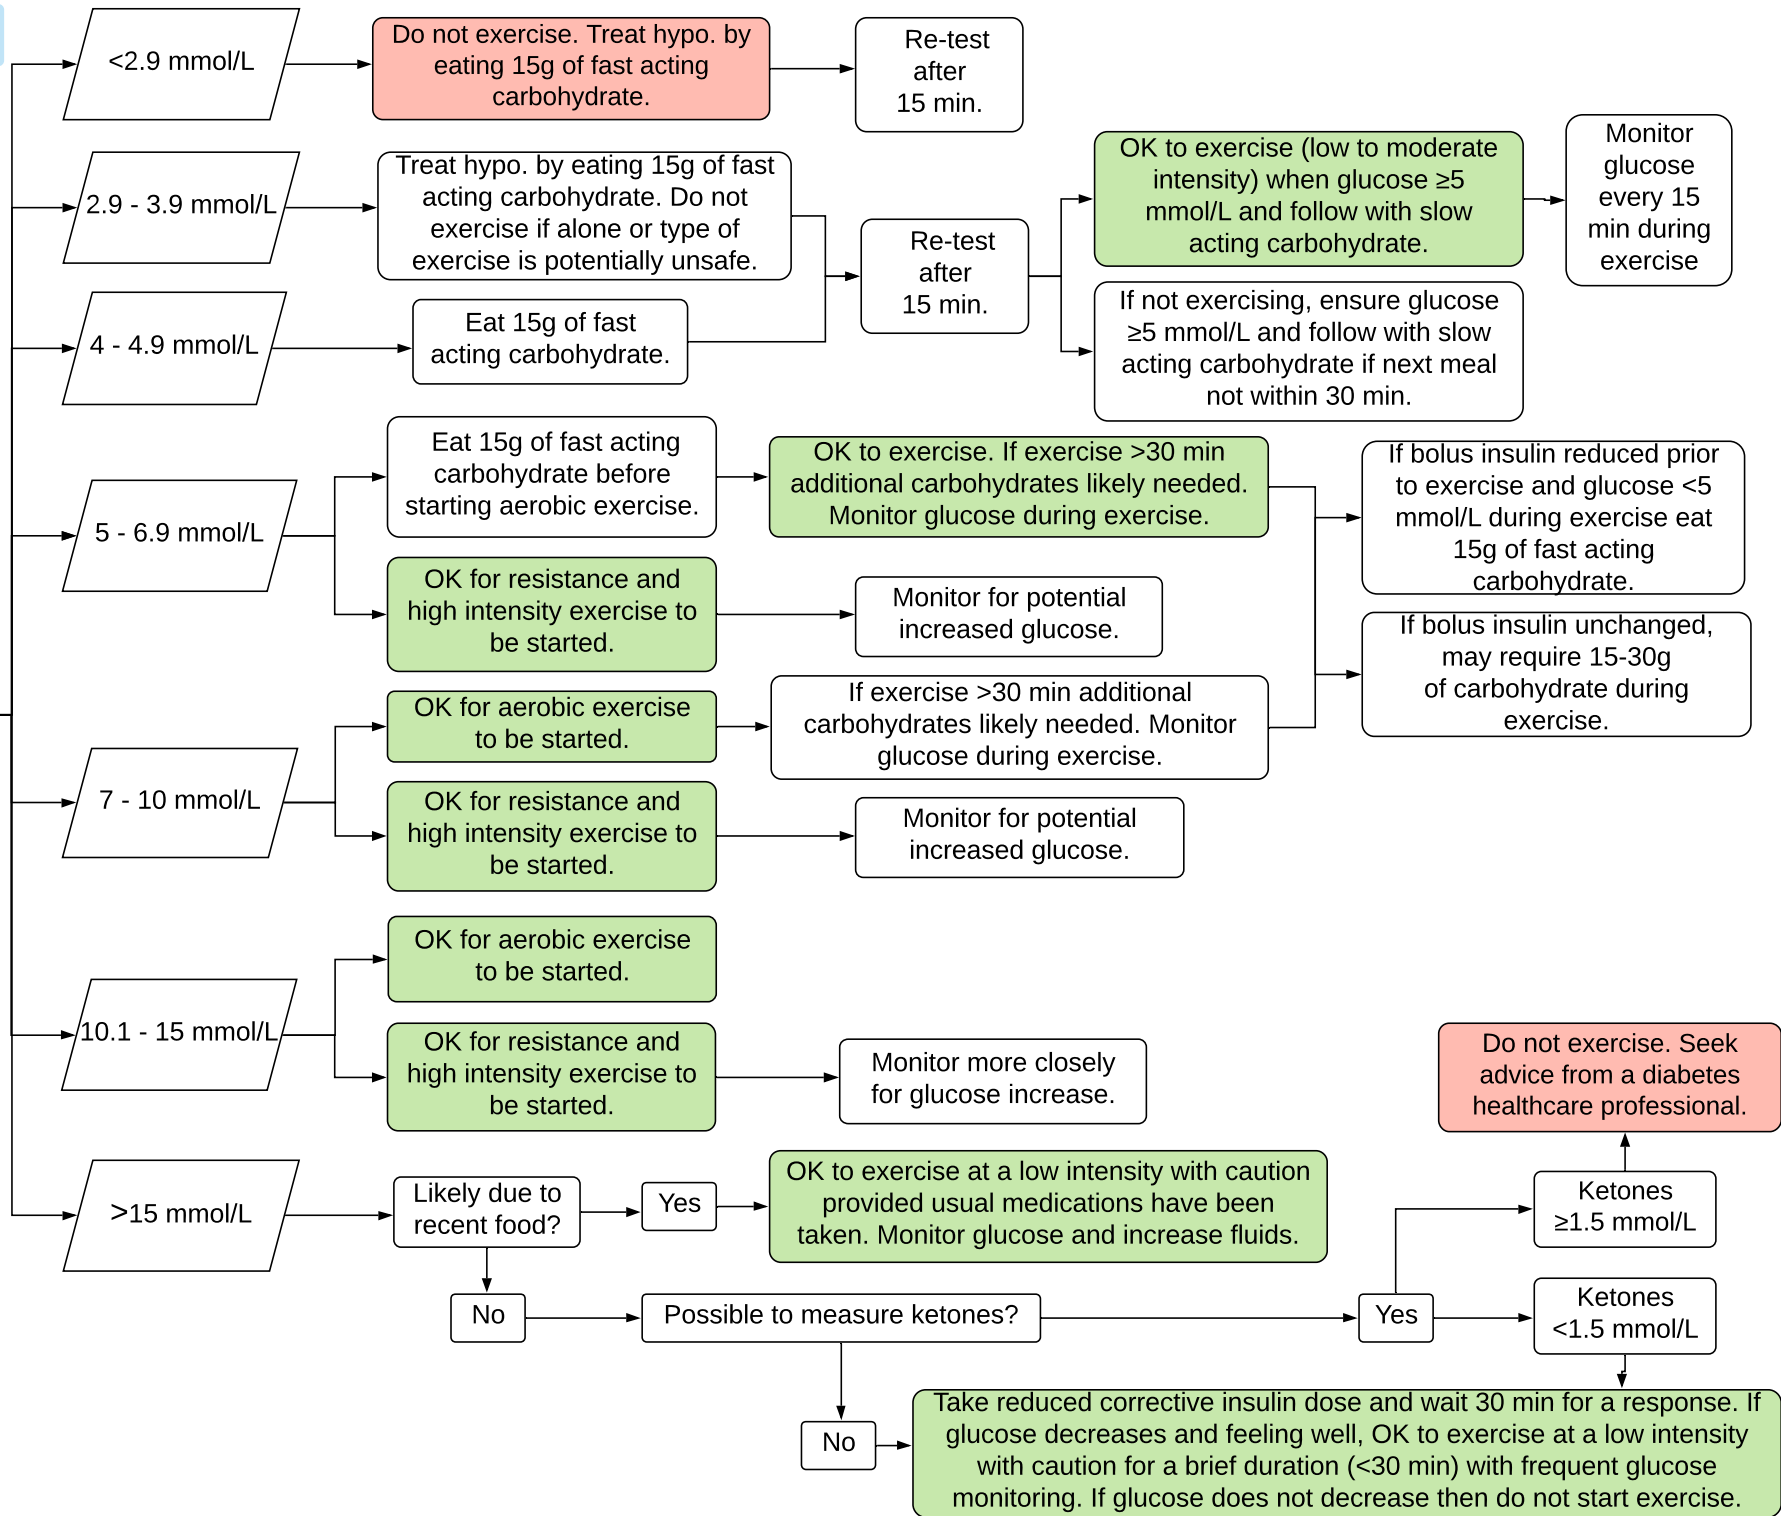

Supplement: Supplementary file [file 17085362]
